# Supplementary material for: Development and evaluation of a deep learning model for protein–ligand binding affinity prediction
Source: PubMed Central journal article supplement (PMC6198856; doi:10.1093/bioinformatics/bty374), 2018-05-10

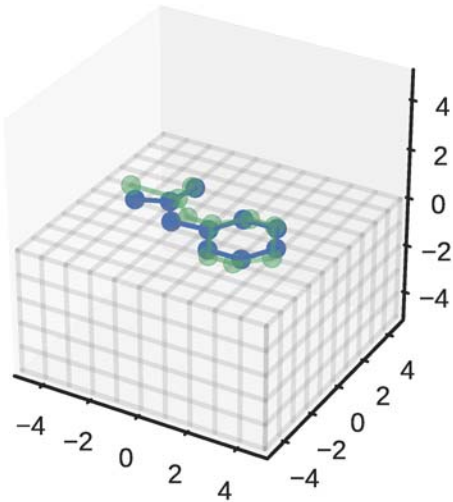

Supplement: bty374_figure_s1.pdf [file bty374_figure_s1.pdf]
